# Supplementary material for: The Effects of Using Evogen Biogas Additive on the Microbiome and Performance of Full-Scale Biogas Plant
Source: MDPI journal article supplement (doi:10.3390/methane2030022), 2023-09-03
Supplement: s1 [file s1]

## Supplementary Material

# The effects of using Evogen Biogas Additive on the microbiome and performance of full-scale biogas plant

**Themistoklis Sfetsas \*, Manthos Panou, Afroditi G. Chioti, Nikoleta Prokopidou and Ioanna Dalla**

QLAB Private Company, Research & Development, Quality Control and Testing Services, 57008 Thessaloniki, Greece; m.panou@q-lab.gr (M.P.); chioti.a@q-lab.gr (A.G.C.); n.prokopidou@q-lab.gr (N.P.); idalla@q-lab.gr (I.D.)

\* Correspondence: t.sfetsas@q-lab.gr; Tel.: +30 2310 784712

**Table S1.** VFA profile over the supplementation of Evogen Biogas additive in two biogas plants. All concentrations are reported as parts per million (ppm).

[illegible]

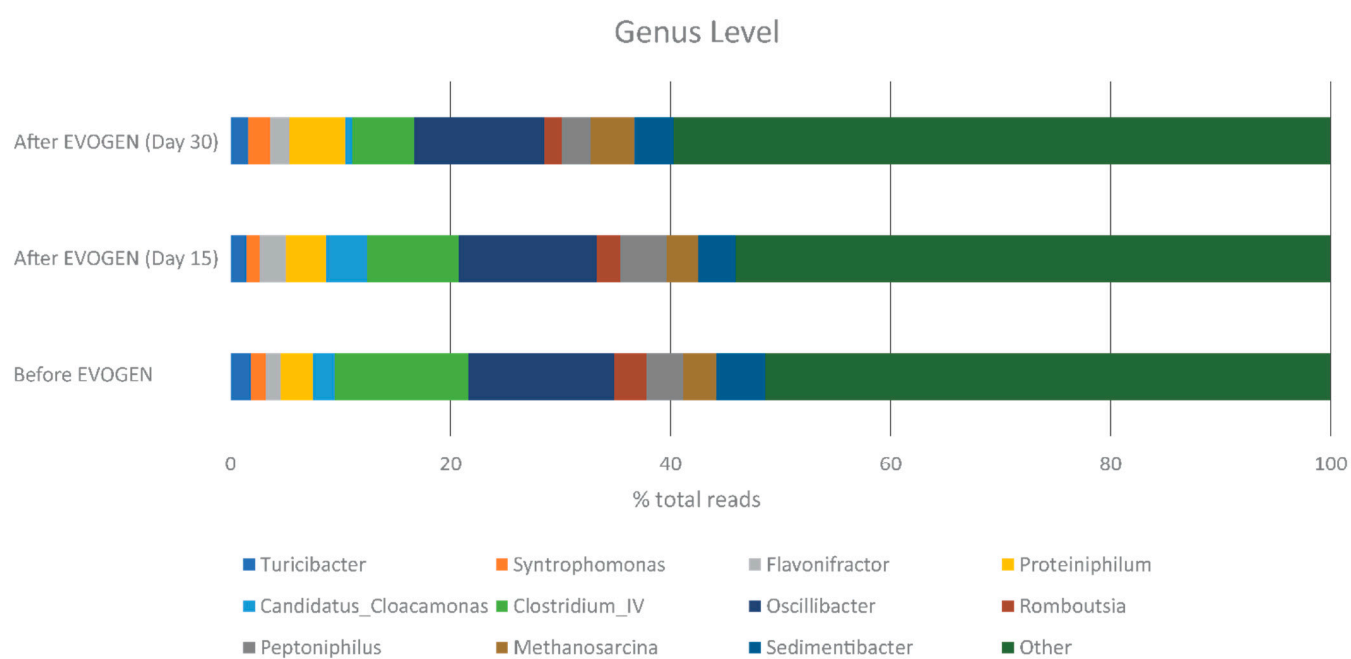

**Figure S1.** Abundance of the 16S rRNA operational taxonomic units in BG02 over Evogen Biogas additive administration classified in Genus rank.

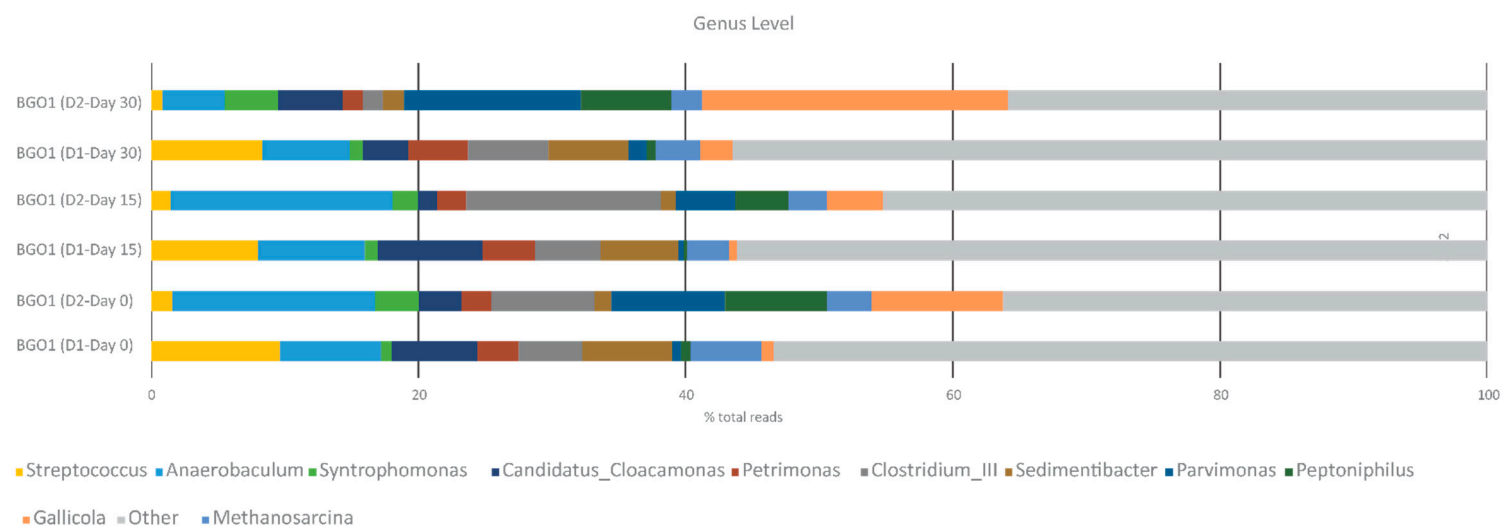

**Figure S2.** Abundance of the 16S rRNA operational taxonomic units in BG01 over Evogen Biogas additive administration classified in Genus rank.
